# Supplementary material
Source: Springer Nature journal article supplement (https://www.springermedizin.de/resource/supplementary/11689_2013_72_MOESM6_ESM.pdf/9673180)

Greater ASD Symptoms

Fewer ASD Symptoms

Left Right

Left Right

Low  
Frequency  
Band

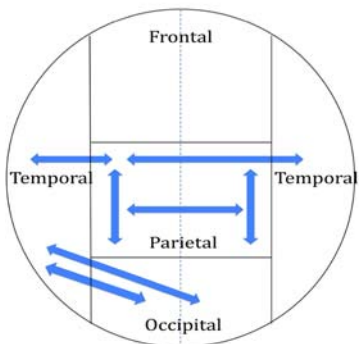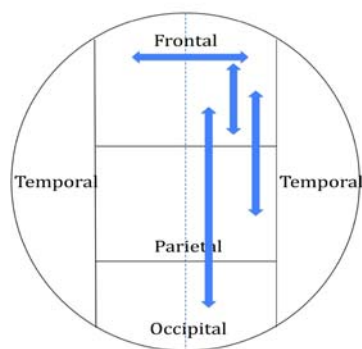

Left Right

Left Right

Beta  
Frequency  
Band

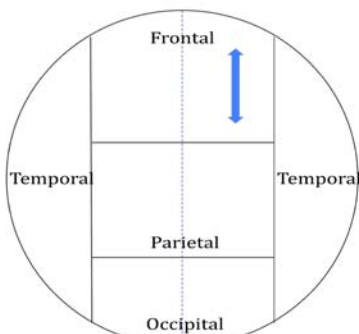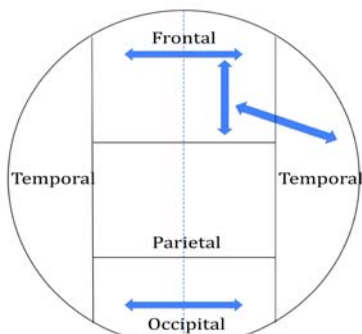

Left Right

Left Right

Gamma  
Frequency  
Band

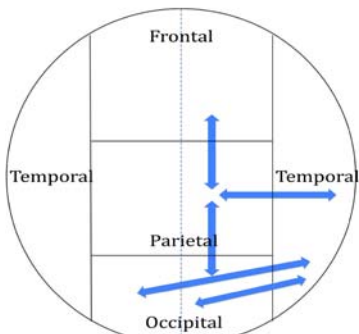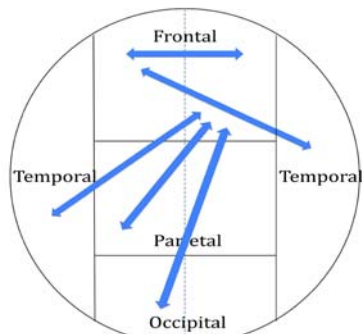

Supplement: MOESM6 [file 9673180]
